# Supplementary material for: A BODIPY-based fluorescent probe for simultaneous detection of H2O2 and viscosity during the pyroptosis process
Source: Royal Society of Chemistry journal article supplement (doi:10.1039/d3cc03914e), 2023-01-01

*Electronic Supplementary Information (ESI) for*

## BODIPY-based fluorescent probe for simultaneous detection of H<sub>2</sub>O<sub>2</sub> and viscosity during the pyroptosis process

Yuan Mei,<sup>a</sup> Ziyun Li,<sup>b</sup> Kuanrong Rong,<sup>b</sup> Zijuan Hai,<sup>c</sup> Wenjian Tang\*<sup>b</sup> and Qin-Hua Song\*<sup>a</sup>

<sup>a</sup>Department of Chemistry, University of Science and Technology of China, Hefei 230026, P. R.

China. E-mail: [qhsong@ustc.edu.cn](mailto:qhsong@ustc.edu.cn)

<sup>b</sup>School of Pharmacy, Anhui Medical University, Hefei, 230032, P. R. China.

E-mail: [ahmupharm@126.com](mailto:ahmupharm@126.com) (W. Tang)

### Contents

|                                                                                                        |         |
|--------------------------------------------------------------------------------------------------------|---------|
| 1. Experimental details .....                                                                          | S2–S5   |
| 2. Summary for structures and properties of probes for H <sub>2</sub> O <sub>2</sub> and viscosity ... | S6–S7   |
| 3. Spectral response of probe P-HV toward viscosity .....                                              | S8      |
| 4. Spectral response of probe P-HV toward H <sub>2</sub> O <sub>2</sub> .....                          | S9–S10  |
| 5. HRMS evidence for the sensing mechanism.....                                                        | S11     |
| 6. Cell experiments.....                                                                               | S12–S15 |
| 7. Mice experiments .....                                                                              | S16–S17 |
| 8. Copies of NMR spectra of related compound.....                                                      | S18     |

## 1. Experimental details

### Materials and methods

All chemicals for synthesis were purchased from commercial suppliers and used as received without further purification. Solvents were purified by standard procedures before use. NMR spectra were recorded on 500M and 400M Bruker AV spectrometers operating at 500 MHz for  $^1\text{H}$  NMR and 101 MHz for  $^{13}\text{C}$  NMR. UV/Vis absorption was acquired on a Shimadzu 2450 UV/Vis spectrometer. Fluorescence spectra were acquired on a Hitachi F-4600 spectrofluorophotometer and a spectrofluorometer FS 5 (Edinburgh Instruments). The high-resolution mass spectrometry (HRMS) was obtained on Waters XEVO G2 Q-TOF. Confocal fluorescence images were acquired using a Leica TCS SP5 confocal laser scanning microscopy. The NIR I fluorescence images were obtained using an IVIS Lumina XR (IS1241N6071) imaging system,  $\lambda_{\text{ex}} = 540$  nm,  $\lambda_{\text{em}} = 620$  nm. The NIR II fluorescence images were obtained using an in vivo master system under 808 nm laser and a 900 nm long-pass filter. The fluorescence intensity of confocal images were analyzed using Image J software.

### Preparation of reactive oxygen species (ROS) and reactive nitrogen species (RNS)

Hydrogen peroxide ( $\text{H}_2\text{O}_2$ ) was prepared by diluting commercial  $\text{H}_2\text{O}_2$  solution in deionized water, and the concentration of  $\text{H}_2\text{O}_2$  solution was determined by recording the UV/Vis absorption at 240 nm ( $\epsilon_{240\text{ nm}} = 43.6\text{ M}^{-1}\text{cm}^{-1}$ ). HOCl was obtained by diluting NaClO solution in deionized water, and the concentration of HClO solution was determined by recording the UV/Vis absorption at 292 nm ( $\epsilon_{292\text{ nm}} = 350\text{ M}^{-1}\text{cm}^{-1}$ ). Nitric oxide (NO) was prepared by using Sodium Nitroprusside (SNP,  $\text{Na}_2\text{Fe}(\text{CN})_5\text{NO}\cdot 2\text{H}_2\text{O}$ ). Hydroxyl radical ( $\cdot\text{OH}$ ) was generated by the Fenton reaction of  $\text{Fe}^{2+}$  solution and hydrogen peroxide ( $\text{H}_2\text{O}_2$ ). Superoxide ( $\text{O}_2^{\cdot-}$ ) was obtained by dissolving  $\text{KO}_2$  in dry DMSO, and the concentration of  $\text{O}_2^{\cdot-}$  solution was determined by recording the UV/Vis absorption at 250 nm ( $\epsilon_{250\text{ nm}} = 2690\text{ M}^{-1}\text{cm}^{-1}$ ). Singlet oxygen ( $^1\text{O}_2$ ) was prepared by mixing HClO (10 eq.) and  $\text{H}_2\text{O}_2$  in the PBS buffer.

### Synthesis and characterization of probe P-HV

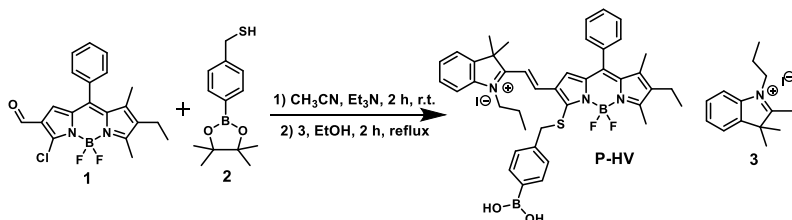

*(E)-2-(2-(3-((4-boronobenzyl)thio)-8-ethyl-5,5-difluoro-7,9-dimethyl-10-phenyl-5H-5 $\lambda^4$ ,6 $\lambda^4$ -dipyrrolo[1,2-c:2',1'-f][1,3,2]diazaborin-2-yl)vinyl)-3,3-dimethyl-1-propyl-3H-indol-1-ium (P-HV)*. To 20 mL dry  $\text{CH}_3\text{CN}$  was added **1** (193.3 mg, 0.50 mmol), compound **2** (375.2 mg, 1.50 mmol) (Reference: *Angew. Chem. Int. Ed.*, 2018, **57**, 6324–6328) and  $\text{Et}_3\text{N}$  (208.5  $\mu\text{L}$ , 1.50 mmol) under  $\text{N}_2$  protection, the mixture was stirred at room temperature

for 2 h. Then, water was added and the crude compound was extracted twice with CH<sub>2</sub>Cl<sub>2</sub>. After being dried by anhydrous Na<sub>2</sub>SO<sub>4</sub>, the solvent was removed under reduced pressure. The mixture was purified by silica gel column to obtain the crude product, the crude product was used directly in the next step without further purification. To 15 mL dry EtOH was added crude product and compound **3** (128.4 mg, 0.39 mmol), the reaction mixture was heated to reflux for 2 h. After removal of the solvent, the product was purified by silica gel flash chromatography (CH<sub>2</sub>Cl<sub>2</sub>/MeOH, v/v, 100/1) to afford compound **P-HV** as a black solid (12.5 mg, 3.0%), *R<sub>f</sub>* = 0.38 (CH<sub>2</sub>Cl<sub>2</sub>/MeOH, v/v, 20/1). <sup>1</sup>H NMR (500 MHz, CDCl<sub>3</sub>, 25°C, TMS): δ = 7.72 (d, *J* = 8.0 Hz, 1H, Ar-H), 7.64 (m, 3H, Ar-H), 7.54 (m, 3H, Ar-H), 7.49 (t, *J* = 7.2 Hz, 1H, Ar-H), 7.45–7.42 (m, 3H, Ar-H), 6.73 (d, *J* = 7.5 Hz, 2H, Ar-H), 6.46 (s, 1H, pyrrole-H), 6.32 (m, 2H), 4.51 (t, *J* = 7.0 Hz, 2H, -NCH<sub>2</sub>CH<sub>2</sub>CH<sub>3</sub>), 4.19 (s, 2H, CH<sub>2</sub>S), 2.79 (s, 3H, CH<sub>3</sub>C=N), 2.45 (q, *J* = 7.0, 14.5 Hz, 2H, CH<sub>2</sub>CH<sub>3</sub>), 1.86 (q, *J* = 7.5, 14.5 Hz, 2H, -CH<sub>2</sub>CH<sub>2</sub>CH<sub>3</sub>), 1.63 (s, 2H, B(OH)<sub>2</sub>), 1.53 (s, 3H, CH<sub>3</sub>C=C), 1.51 (s, 6H, (CH<sub>3</sub>)<sub>2</sub>C), 1.09 (t, *J* = 7.5 Hz, 3H, CH<sub>3</sub>CH<sub>2</sub>), 0.98 (t, *J* = 7.5 Hz, 3H, CH<sub>3</sub>CH<sub>2</sub>CH<sub>2</sub>). <sup>13</sup>C NMR (101 MHz, CDCl<sub>3</sub>, 25°C, TMS): δ = 180.76 (C=N), 170.46, 146.81, 144.74, 144.54, 142.34, 140.41, 139.94, 139.65, 139.33, 138.32, 136.96, 134.86, 132.83, 132.40, 130.31, 129.69, 129.31, 128.86, 128.13, 122.39, 119.04, 115.27, 108.29, 52.16, 49.01, 42.79, 29.71, 27.22, 21.84, 17.33, 13.96, 12.73, 11.42. HRMS (TOF) *m/z* calcd. for C<sub>41</sub>H<sub>44</sub>B<sub>2</sub>F<sub>2</sub>N<sub>3</sub>O<sub>2</sub>S<sup>+</sup>: 702.3303 [M]<sup>+</sup>, found: 702.3312.

### **pH effects of probe and its product**

We prepared the different pH buffer solutions (10 mM), involving citric acid-sodium citrate buffer for pH 3–5, Na<sub>2</sub>HPO<sub>4</sub>-NaH<sub>2</sub>PO<sub>4</sub> buffer for pH 6–8, Na<sub>2</sub>CO<sub>3</sub>-NaHCO<sub>3</sub> buffer for pH 9–11, NaH<sub>2</sub>PO<sub>4</sub>-NaOH for pH 12. The fluorescence intensity of probe P-HV and its sensing products PH at 835 nm were investigated by determining fluorescence spectra of 10 μM P-HV before and after the addition of 100 μM H<sub>2</sub>O<sub>2</sub> in different buffer solutions.

### **Fluorescence analysis.**

The probe P-HV was dissolved in dimethyl sulfoxide (DMSO) to prepare a stock solution (2 mM). The final test solution of P-HV (10 μM) was prepared by diluting the stock solution with buffer solution (DMSO/PBS (pH 7.4), v/v, 4/6), all samples were determined at room temperature (25°C). The spectral response of probe P-HV toward viscosity and H<sub>2</sub>O<sub>2</sub> were excited at 500 and 720 nm, respectively.

### **Cell-imaging experiments**

*Cell culture and MTT assay.* HepG2 cells were cultured in Dulbecco's modified Eagle's medium (DMEM) mixed with 10% fetal bovine serum (FBS) and penicillin (100 units/mL)-streptomycin (100 g/mL) liquid (Zhejiang Tianhang Biotechnology Co., Ltd.) and grown in an incubator under an atmosphere of 5% CO<sub>2</sub> at 37°C. HepG2 cells were used to investigate the toxicity of the probe based on MTT assay, cells were cultured in 96-well plate (6 × 10<sup>4</sup> cells/well) in an incubator for 12 h. After removing the medium, added

200  $\mu\text{L}$  medium containing different concentrations of probe P-HV (0–30  $\mu\text{M}$ ). After 24 h, removed the medium and washed twice with PBS buffer, incubated with 10  $\mu\text{L}$  MTT reagent (5 mg/mL) for another 4 h in incubator, and then added 150  $\mu\text{L}$  DMSO to dissolve formazan. For each concentration, the assays were measured in five replicates. The absorbance of each well at 570 nm measured by a multi-well plate reader, the cell viability was calculated using the following formula:  $(a - b)/(c - b) \times 100\%$ , where  $a$ ,  $b$  and  $c$  are absorbance of treated wells, control wells and untreated wells, respectively.

*Cell imaging.* The HepG2 cells were incubated with nystatin (0, 5, 10 or 20  $\mu\text{M}$ ) for 45 min in an incubator to investigate the fluctuation of cytoplasmic viscosity. After the incubation of nystatin was completed, the dishes were washed with PBS buffer, and then the probe P-HV (20  $\mu\text{M}$ ) was added for another 30 min. For detecting exogenous  $\text{H}_2\text{O}_2$ , the cells were treated with  $\text{H}_2\text{O}_2$  (0, 100, 200 or 400  $\mu\text{M}$ ) for 30 min, then washed the dishes with PBS buffer and the probe P-HV (20  $\mu\text{M}$ ) was added for another 30 min. Next, the cells were treated with Trypsin-EDTA solution to transfer the cells from dishes to centrifuge tubes with PBS or DMEM. The NAC (N-acetylcysteine) and LPS (Lipopolysaccharide) were used to inhibit and stimulate the generation of  $\text{H}_2\text{O}_2$  in HepG2 cells, respectively. For the LPS groups, the cells were treated with LPS (2 or 5  $\mu\text{g}/\text{mL}$ ) for 10 h, and then the cells were incubated with the probe P-HV (20  $\mu\text{M}$ ) for another 30 min. For the NAC group, before the stimulation of LPS, the cells were first incubated with NAC (500  $\mu\text{M}$ ) for 1 h. After the cells were treated with the probe P-HV (20  $\mu\text{M}$ ) for another 30 min, the cells were transferred into centrifuge tubes for NIR II fluorescence imaging.

Palmitic acid (PA)-stimulated HepG2 cells were chosen as a pyroptosis model, the cells were treated with PA (0, 30, 60 or 100  $\mu\text{M}$ ) for 12 h, then incubated with the probe P-HV (20  $\mu\text{M}$ ) for another 30 min, transferred into centrifuge tubes to obtain the NIR II and NIR I fluorescence imaging. We also investigated the incubation time of PA and the effect of NAC on the generation of  $\text{H}_2\text{O}_2$  in living HepG2 cells. For the PA groups, the cells were first treated with PA (0.2 mM) for 6, 12 and 18 h. For the NAC group, the cells further incubated with NAC (1 mM) for another 1 h after 12 h of PA stimulation. The cells were finally incubated with the probe P-HV (20  $\mu\text{M}$ ) for another 30 min, transferred into centrifuge tubes to obtain the NIR II and NIR I fluorescence imaging.

## Mice experiments

All experiments were performed in accordance with the National Institutes of Health Guide for the Care and Use of Laboratory Animals. The procedures for maintenance and treatment of laboratory animals were approved by the Animal Care and Use Committee of the Anhui Medical University (LLSC20190274). Female ICR mice (6–8 weeks old, 25–30 g) from Animal Center of Anhui Medical University (Hefei, China) were used in this work. Mice were maintained with SPF food and water for 1–2 week. The animal room temperature is 20–26°C, warm Humidity 40–70%, 12 hours of light and darkness alternate and normal feeding before animal experiments, and mice should be fasted for 12 h to avoid fluorescence interference from foodstuff.

*Real time tracking the probe P-HV in mice.* Female ICR mice were divided into two groups: one group was the control group, and another group was the H<sub>2</sub>O<sub>2</sub> group, with three mice in each group. The control group was first injected with PBS buffer (pH 7.4, 200 μL) for 30 min, the H<sub>2</sub>O<sub>2</sub> group was first injected with H<sub>2</sub>O<sub>2</sub> solution (3 mM, 200 μL) for 30 min. Before the NIR II fluorescence imaging experiment began, the P-HV solution (500 μM, 200 μL, 5% DMSO) was injected, then real time tracking the response to H<sub>2</sub>O<sub>2</sub> in mice. After 1 h, mice were dissected and major organs were obtained for imaging. The PBS buffer and H<sub>2</sub>O<sub>2</sub> solution were injected by intravenous injection, the P-HV solution was injected by intraperitoneal injection.

*The PA stimulated mice.* Female ICR mice were divided into three groups. The control group was first injected with PBS buffer (pH 7.4, 200 μL) for 12 h. The PA group was first injected with PA solution (50 mg kg<sup>-1</sup>, 200 μL) for 12 h, and the another group was injected with NAC solution (200 mg kg<sup>-1</sup>, 200 μL) for 1 h and then the PA solution (50 mg kg<sup>-1</sup>, 200 μL) was injected for another 12 h. Before dissection, the P-HV solution (500 μM, 200 μL, 5% DMSO) was injected into the mice for 1 h, then major organs were obtained for imaging. The PBS buffer, NAC solution and PA solution were injected by intravenous injection, the P-HV solution was injected by intraperitoneal injection.

2. **Table S1** Summary for structures and properties of probes for H<sub>2</sub>O<sub>2</sub> and viscosity

| Entry | Structures of probes                                                                | Response time/<br>solution system                   | LOD (from 3 $\delta$ /N)<br>/single measurement | $\lambda_{ex}/\lambda_{em}$<br>$\Phi_f$ of the probe                                                                   | Applications                                                                        | References                                                        |
|-------|-------------------------------------------------------------------------------------|-----------------------------------------------------|-------------------------------------------------|------------------------------------------------------------------------------------------------------------------------|-------------------------------------------------------------------------------------|-------------------------------------------------------------------|
| 1     | 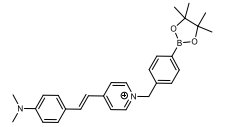   | --<br>DMF/PBS (3/7, pH 8.4)<br>at 37°C              | 2.1 $\mu$ M /10 $\mu$ M                         | H <sub>2</sub> O <sub>2</sub> : 400/510 nm<br>Viscosity: 500/607 nm<br>$\Phi_f$ : 0.27 in 95% glycerol                 | H <sub>2</sub> O <sub>2</sub> generation affect the<br>viscosity                    | <i>Anal. Chem.</i> , <b>2017</b> , <i>89</i> ,<br>1, 552–555.     |
| 2     |    | 100 min (10 eq.)<br>DMSO/PBS (3/7, pH<br>8.0)       | 4.98 nM /2.0 $\mu$ M                            | H <sub>2</sub> O <sub>2</sub> : 420/585 nm<br>Viscosity: 480/730 nm<br>$\Phi_f$ : 0.10 in PBS (30%<br>DMSO, pH = 8.0)  | Viscosity and H <sub>2</sub> O <sub>2</sub> variations<br>in PD models              | <i>J. Mater. Chem. B</i> ,<br><b>2019</b> , <i>7</i> , 4243–4251. |
| 3     |    | 40 min (10 eq.)<br>DMSO/PBS (3/7, pH<br>7.4)        | 3.0 nM /10 $\mu$ M                              | H <sub>2</sub> O <sub>2</sub> : 440/700 nm<br>Viscosity: 570/800 nm<br>$\Phi_f$ : 0.012 in PBS (30%<br>DMSO, pH = 7.4) | Viscosity and H <sub>2</sub> O <sub>2</sub> caused by<br>LPS                        | <i>Chem. Commun.</i> , <b>2020</b> ,<br><i>56</i> , 1050–1053.    |
| 4     |    | --<br>DMSO/PBS (1/1, pH<br>8.4)                     | 141 nM /5.0 $\mu$ M                             | H <sub>2</sub> O <sub>2</sub> : 405/586 nm<br>Viscosity: 488/666 nm<br>$\Phi_f$ : 0.081 in 99% glycerol                | Viscosity and H <sub>2</sub> O <sub>2</sub> caused by<br>LPS                        | <i>Chin. J. Chem.</i> , <b>2021</b> ,<br><i>39</i> , 1303–1309.   |
| 5     |   | 60 min (20 eq.)<br>DMF/PBS (1/9, pH 7.4)<br>at 37°C | 0.37 $\mu$ M /2.5 $\mu$ M                       | H <sub>2</sub> O <sub>2</sub> /Viscosity: 469/667<br>nm<br>$\Phi_f$ : 0.51 in DMSO                                     | Alleviate the inflammation<br>and H <sub>2</sub> O <sub>2</sub> by H <sub>2</sub> S | <i>Talanta</i> , <b>2021</b> , <i>235</i> ,<br>122719.            |
| 6     |  | --<br>DMSO/PBS (1/9, pH<br>7.4) at 37°C             | 4.2 $\mu$ M /--                                 | H <sub>2</sub> O <sub>2</sub> : 405/460 nm<br>Viscosity: 405/614 nm<br>$\Phi_f$ : 0.004 in DMSO                        | Imaging H <sub>2</sub> O <sub>2</sub> in the fatty liver<br>tissue                  | <i>New J. Chem.</i> , <b>2021</b> , <i>45</i> ,<br>12138–12144.   |

|    |                                                                                   |                                               |                          |                                                                                                        |                                                                                    |                                                      |
|----|-----------------------------------------------------------------------------------|-----------------------------------------------|--------------------------|--------------------------------------------------------------------------------------------------------|------------------------------------------------------------------------------------|------------------------------------------------------|
| 7  | 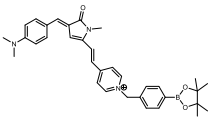 | --<br>PBS (pH 7.4)                            | 2.0 $\mu$ M /2.5 $\mu$ M | H <sub>2</sub> O <sub>2</sub> : --/660 nm<br>Viscosity: --/635 nm<br>$\Phi_f$ : 0.0009 in PBS          | Viscosity caused by LPS                                                            | <i>Dyes Pigm.</i> , <b>2022</b> , 206,<br>110665.    |
| 8  |  | 40 min (20 eq.)<br>Glycerol/PBS (7/3, pH 7.4) | 15 nM /2.5 $\mu$ M       | H <sub>2</sub> O <sub>2</sub> : 410/582 nm<br>Viscosity: 410/475 nm<br>$\Phi_f$ : --                   | Imaging of scrap leather-induced inflammation                                      | <i>Dyes Pigm.</i> , <b>2022</b> , 207,<br>110664.    |
| 9  |  | 100 min (10 eq.)<br>PBS (1% DMSO, pH 7.4)     | 3.3 $\mu$ M /20 $\mu$ M  | H <sub>2</sub> O <sub>2</sub> : 590/670 nm<br>Viscosity: 410/522 nm<br>$\Phi_f$ : 0.09 in EtOH         | Exogenous/endogenous H <sub>2</sub> O <sub>2</sub>                                 | <i>Bioorg. Chem.</i> , <b>2022</b> ,<br>119, 105513. |
| 10 |  | 10 min (5 eq.)<br>DMSO/PBS (4/6, pH 7.4)      | 1.37 $\mu$ M /10 $\mu$ M | H <sub>2</sub> O <sub>2</sub> : 720/835 nm<br>Viscosity: 500/600 nm<br>$\Phi_f$ : 0.26 in 95% glycerol | Imaging H <sub>2</sub> O <sub>2</sub> and viscosity in PA-stimulated cell and mice | This work                                            |

-- Not mentioned.

### 3. Spectral response of probe P-HV toward viscosity

#### 1) Different solvents

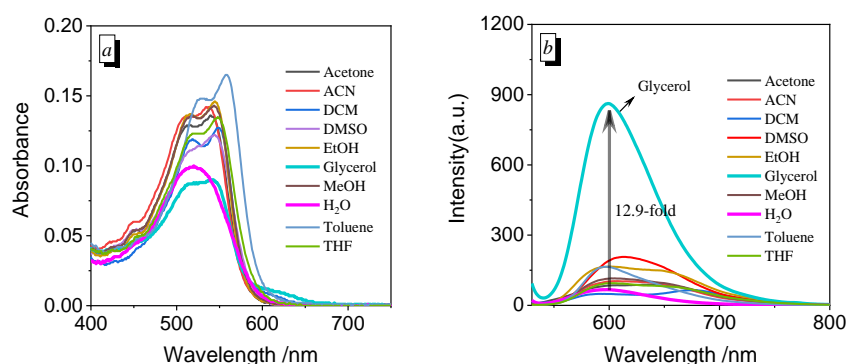

**Fig. S1** (a) UV/Vis absorption and (b) fluorescence spectra of 5  $\mu\text{M}$  P-HV in different solvents,  $\lambda_{\text{ex}} = 500 \text{ nm}$ .

#### 2) **Table S2** Photophysical properties of P-HV<sup>a</sup>

| Solvents              | $\lambda_{\text{abs}}$ (nm) | $\lambda_{\text{em}}$ (nm) | $\epsilon$ ( $\text{M}^{-1}\text{cm}^{-1}$ ) | Stokes shift (nm) | Polarity index <sup>b</sup> | Viscosity (cP, 20°C) | $\Phi_f$ <sup>c</sup> |
|-----------------------|-----------------------------|----------------------------|----------------------------------------------|-------------------|-----------------------------|----------------------|-----------------------|
| Glycerol <sup>d</sup> | 544                         | 600                        | 17800                                        | 56                | 6.0                         | 523                  | 0.26                  |
| Toluene               | 557                         | 598                        | 33000                                        | 41                | 2.4                         | 0.59                 | 0.070                 |
| DCM                   | 548                         | 676                        | 25400                                        | 128               | 3.4                         | 0.44                 | 0.034                 |
| THF                   | 548                         | 601                        | 27000                                        | 53                | 4.2                         | 0.55                 | 0.043                 |
| EtOH                  | 545                         | 601                        | 29200                                        | 56                | 4.3                         | 1.20                 | 0.047                 |
| Acetone               | 540                         | 642                        | 27200                                        | 102               | 5.4                         | 0.32                 | 0.039                 |
| ACN                   | 538                         | 607                        | 28400                                        | 69                | 6.2                         | 0.37                 | 0.031                 |
| MeOH                  | 544                         | 598                        | 28600                                        | 54                | 6.6                         | 0.60                 | 0.031                 |
| DMSO                  | 544                         | 614                        | 24400                                        | 70                | 7.2                         | 2.24                 | 0.087                 |
| H <sub>2</sub> O      | 520                         | 602                        | 20600                                        | 82                | 10.2                        | 1.00                 | 0.023                 |

<sup>a</sup> The concentration of P-HV solution was 5  $\mu\text{M}$ .

<sup>b</sup> n-pentane as the reference (Polarity index = 0).

<sup>c</sup> Rhodamine 6G in EtOH ( $\Phi_f = 0.95$ ) was used as a reference (*Photochem. Photobiol.*, 2002, **75**, 4, 327–334).

<sup>d</sup> 95% glycerol + 5% deionized water.



#### 4. Spectral response of probe P-HV toward H<sub>2</sub>O<sub>2</sub>

##### 1) Time-dependent UV/Vis absorption

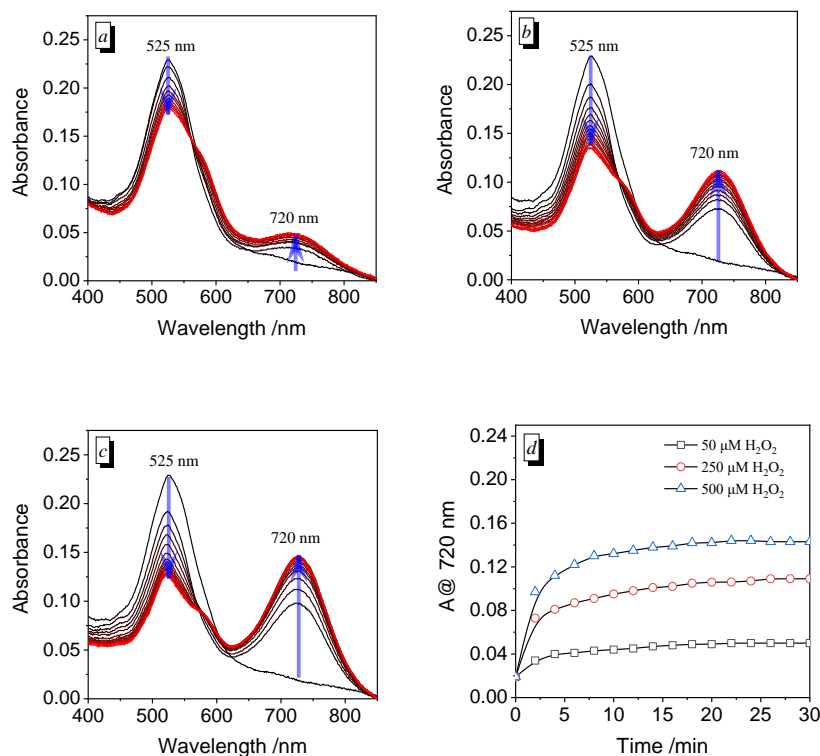

**Fig. S2** Time-dependent absorption of 10  $\mu\text{M}$  P-HV after the addition of 50 (a), 250 (b) or 500  $\mu\text{M}$  (c) H<sub>2</sub>O<sub>2</sub> in the buffer solution (DMSO/PBS (pH 7.4), v/v, 4/6), measured every two minutes. (d) Time profile of absorption intensities at 720 nm in (a–c).

##### 2) The selectivity

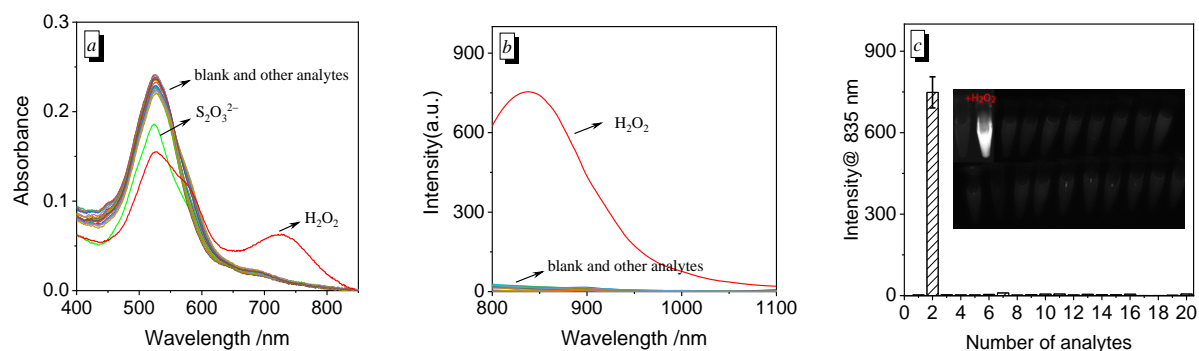

**Fig. S3** (a) UV/Vis absorption, (b) fluorescence spectra and (c) fluorescence intensity at 835 nm of 10  $\mu\text{M}$  P-HV in the presence of 100  $\mu\text{M}$  H<sub>2</sub>O<sub>2</sub> or other analytes in the buffer solution (DMSO/PBS (pH 7.4), v/v, 4/6),  $\lambda_{\text{ex}} = 720 \text{ nm}$ . Inset: NIR II fluorescence imaging of reaction solution in (a),  $\lambda_{\text{ex}} = 808 \text{ nm}$ , long-pass filter: 900 nm, laser intensity: 5 W, exposure time: 200 ms. Analytes: 1. blank, 2. H<sub>2</sub>O<sub>2</sub>, 3. O<sub>2</sub><sup>-</sup>, 4. HOCl, 5. DTBP, 6. •OH, 7. <sup>1</sup>O<sub>2</sub>, 8. O<sub>2</sub><sup>-</sup>, 9. NO, 10. NO<sub>2</sub><sup>-</sup>, 11. CH<sub>3</sub>COO<sup>-</sup>, 12. S<sub>2</sub>O<sub>3</sub><sup>2-</sup>, 13. SCN<sup>-</sup>, 14. Cu<sup>2+</sup>, 15. Zn<sup>2+</sup>, 16. Mg<sup>2+</sup>, 17. Fe<sup>2+</sup>, 18. GSH, 19. Cys, 20. HS<sup>-</sup>.

### 3) Simultaneously response to $H_2O_2$ and viscosity

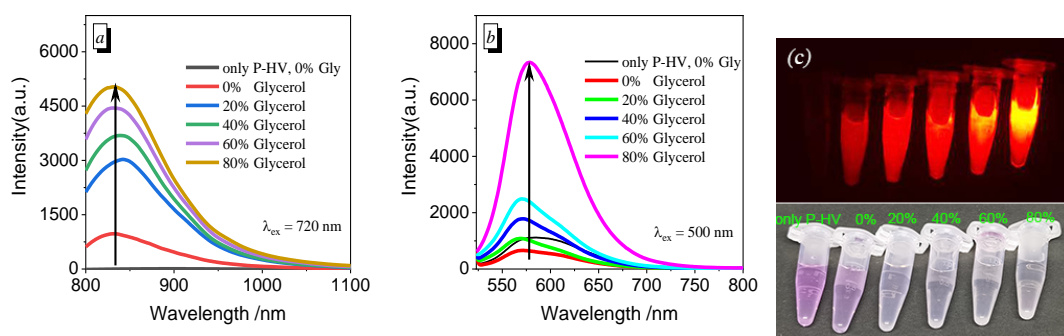

**Fig. S4** The fluorescence spectra of 10  $\mu\text{M}$  P-HV toward (a) 200  $\mu\text{M}$   $H_2O_2$  and (b) viscosity in different ratios of PBS buffer-glycerol mixtures, respectively. (c) NIR II fluorescence imaging of reaction solution in (a),  $\lambda_{\text{ex}} = 808$  nm, long-pass filter: 900 nm, laser intensity: 5 W, exposure time: 15 ms.

## 5. HRMS evidence for the sensing mechanism

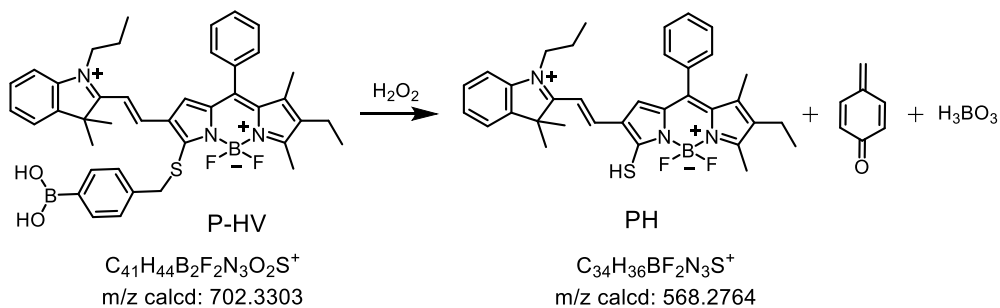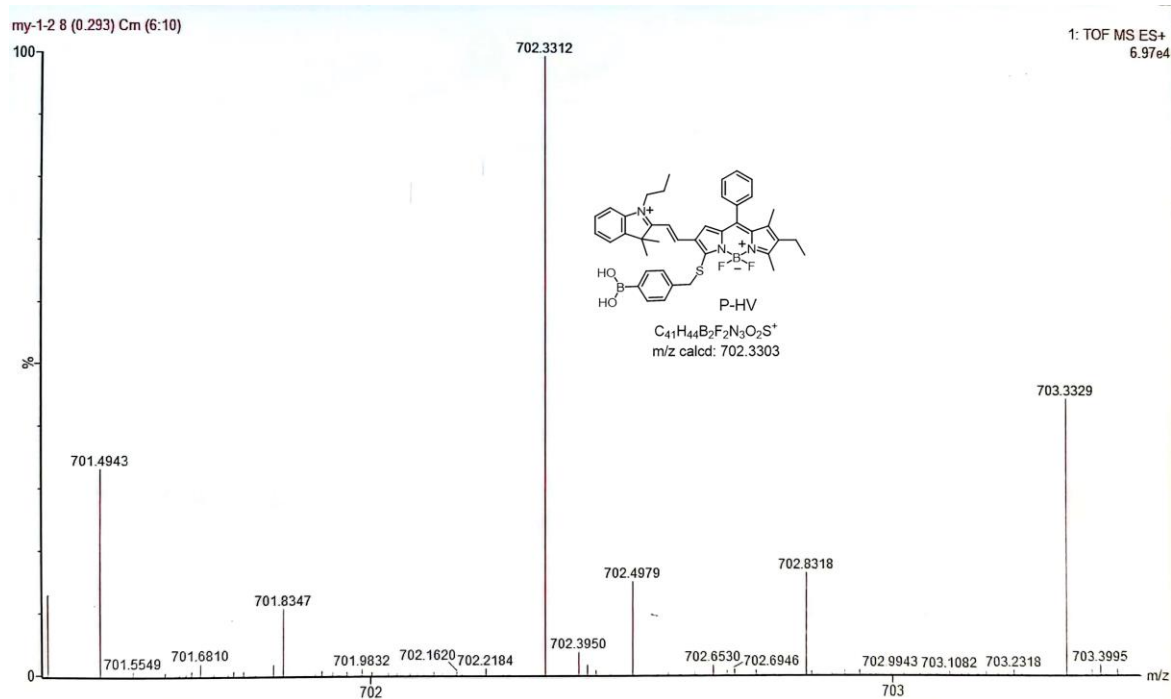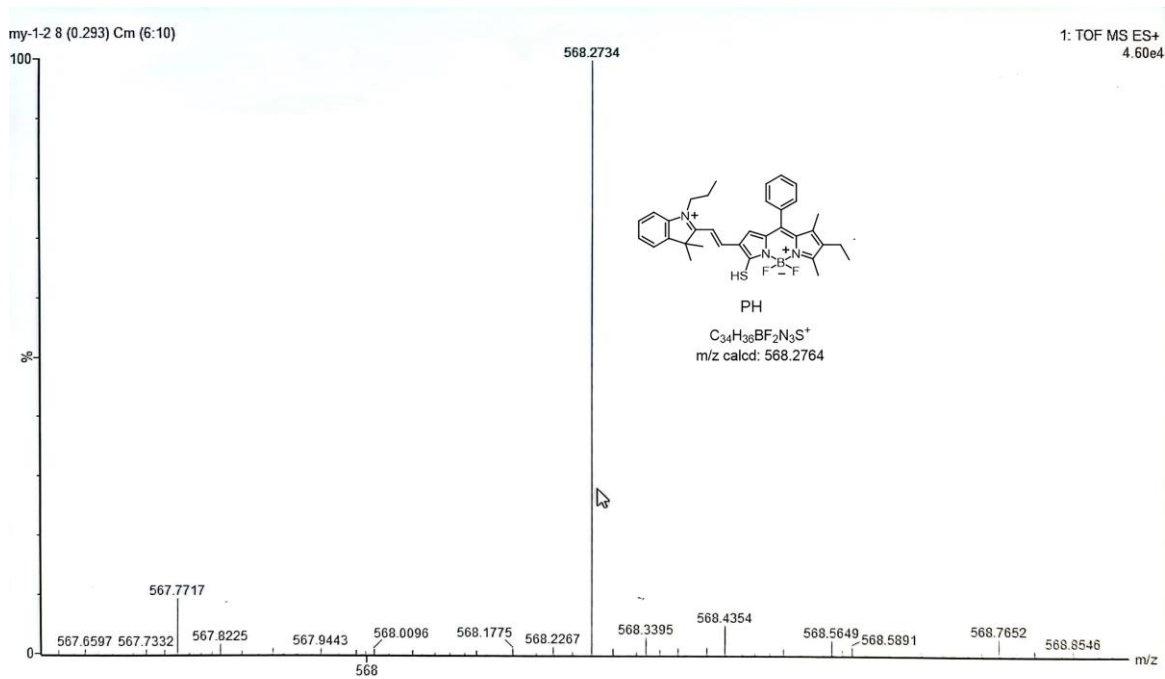

**Fig. S5** The mass spectra of 10  $\mu\text{M}$  P-HV in the presence of 200  $\mu\text{M}$   $\text{H}_2\text{O}_2$ .

## 6. Cell experiments

### 1) The pH effects

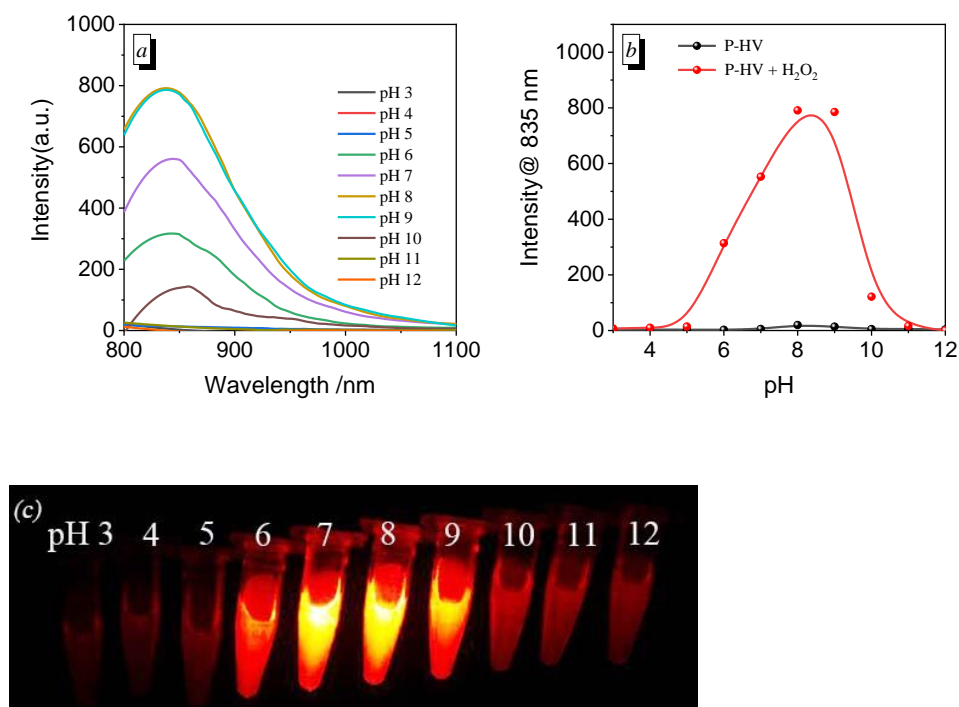

**Fig. S6** (a) Fluorescence spectra and (b) fluorescence intensity at 835 nm of 10  $\mu\text{M}$  P-HV in the presence of 100  $\mu\text{M}$   $\text{H}_2\text{O}_2$  in different buffer solution,  $\lambda_{\text{ex}} = 720$  nm. (c) NIR II fluorescence imaging of reaction solution in (a),  $\lambda_{\text{ex}} = 808$  nm, long-pass filter: 900 nm, laser intensity: 5 W, exposure time: 100 ms.

### 2) MTT assay

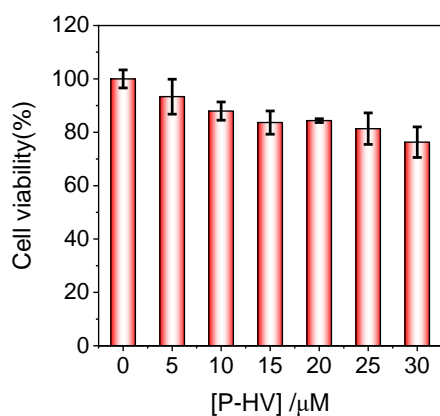

**Fig. S7** MTT assay of HepG2 cells in the presence of P-HV (0–30  $\mu\text{M}$ ), incubated for 24 h.

### 3) Cell imaging of viscosity changes

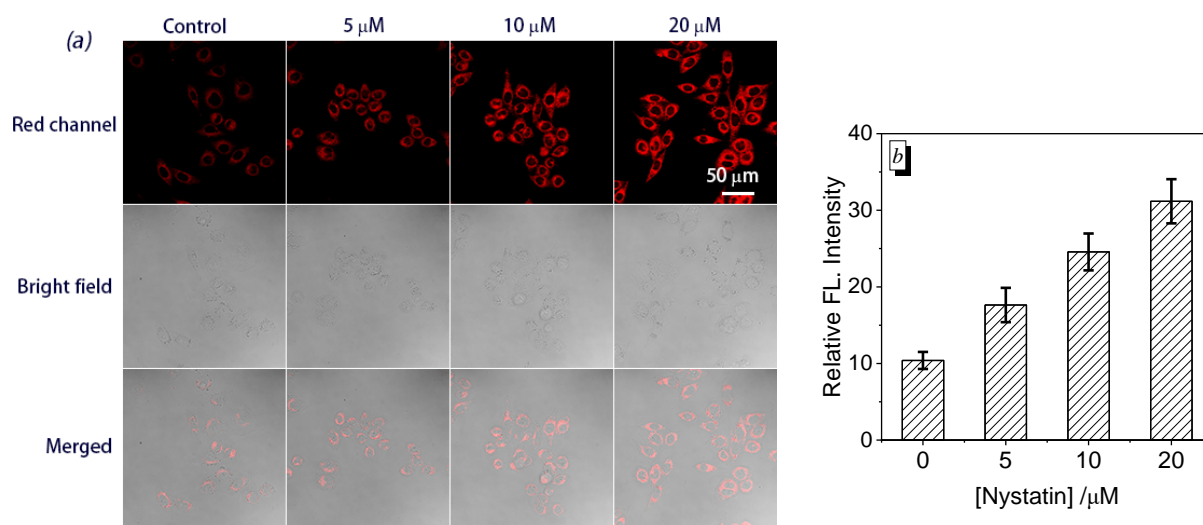

**Fig. S8** (a) Fluorescence imaging of cytoplasmic viscosity in HepG2 cells in the presence of nystatin. The cells treated with nystatin (0, 5, 10 or 20  $\mu\text{M}$ , 45 min), then incubated with P-HV (20  $\mu\text{M}$ , 30 min). (b) Relative fluorescence intensity of (a), analyzed using Image J. The fluorescence collected in 550–750 nm for red channel, excited at 514 nm.

### 4) Cell imaging of exogenous $\text{H}_2\text{O}_2$

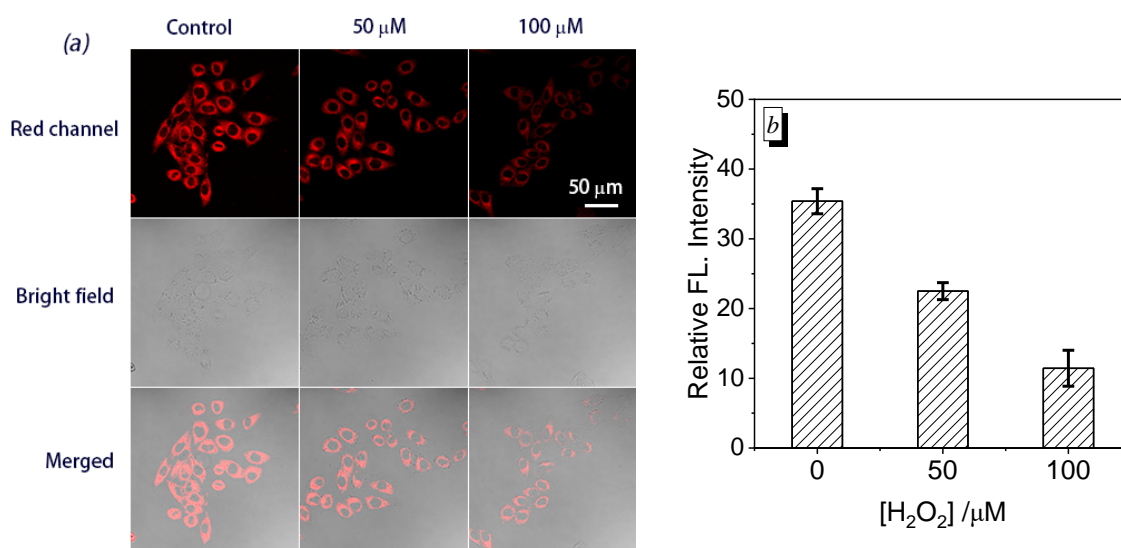

**Fig. S9** (a) Fluorescence imaging of P-HV in HepG2 cells in the presence of  $\text{H}_2\text{O}_2$ . The cells treated with  $\text{H}_2\text{O}_2$  (0, 50 or 100  $\mu\text{M}$ , 30 min), then incubated with P-HV (20  $\mu\text{M}$ , 30 min). (b) Relative fluorescence intensity of (a), analyzed using Image J. The fluorescence collected in 550–750 nm for red channel, excited at 514 nm.

### 5) Fluorescence imaging of exogenous $H_2O_2$

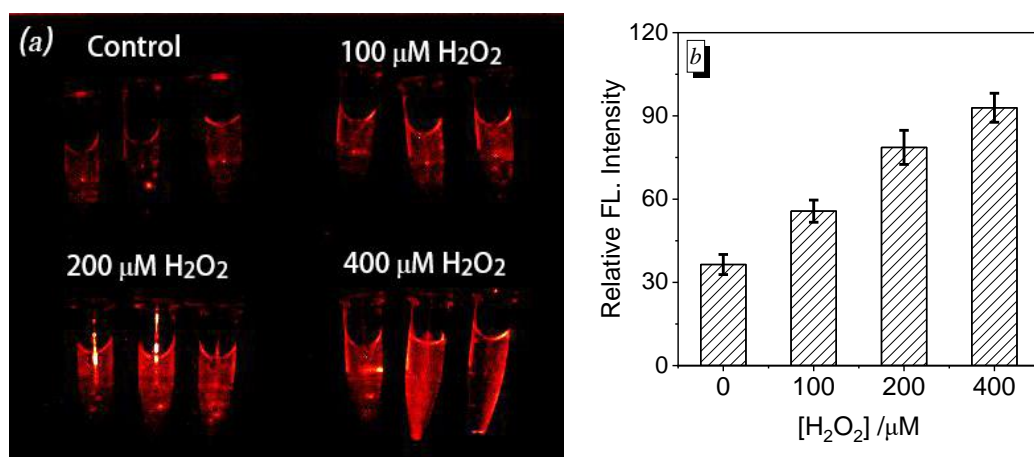

**Fig. S10** (a) NIR II fluorescence imaging of exogenous  $H_2O_2$  in HepG2 cells. The cells treated with  $H_2O_2$  (0, 100, 200 or 400  $\mu$ M, 30 min), then incubated with P-HV (20  $\mu$ M, 30 min),  $\lambda_{ex}$  = 808 nm, long-pass filter: 900 nm, laser intensity: 10 W, exposure time: 800 ms. (b) Relative fluorescence intensity of (a), analyzed using Image J.

### 6) Fluorescence imaging of endogenous $H_2O_2$

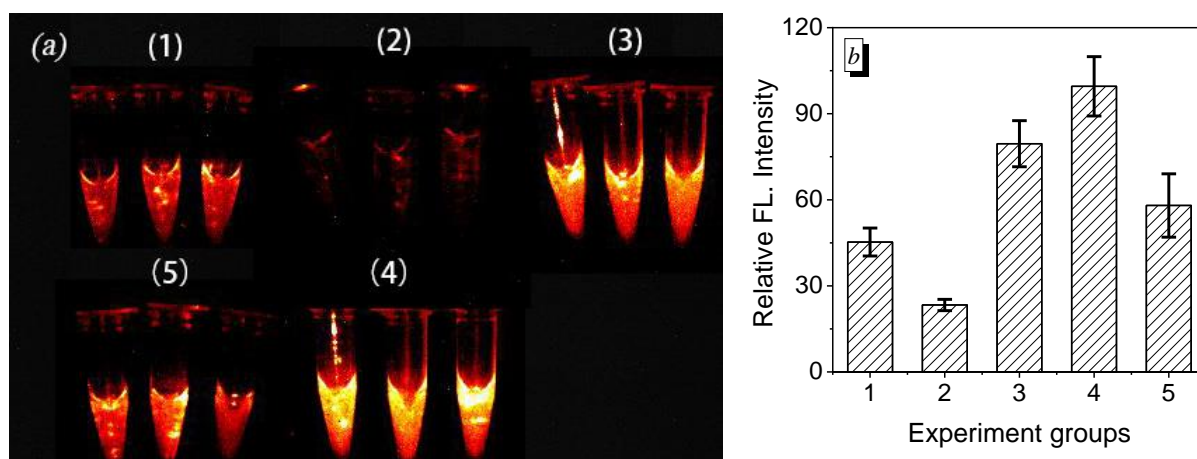

| Entry | NAC<br>(500 $\mu$ M, 1 h) | LPS<br>(10 h) | P-HV<br>(20 $\mu$ M, 30 min) |
|-------|---------------------------|---------------|------------------------------|
| (1)   | –                         | –             | +                            |
| (2)   | +                         | –             | +                            |
| (3)   | –                         | 2 $\mu$ g/mL  | +                            |
| (4)   | –                         | 5 $\mu$ g/mL  | +                            |
| (5)   | +                         | 2 $\mu$ g/mL  | +                            |

**Fig. S11** (a) NIR II fluorescence imaging of endogenous  $H_2O_2$  in HepG2 cells under the stimulation of LPS,  $\lambda_{ex}$  = 808 nm, long-pass filter: 900 nm, laser intensity: 10 W, exposure time: 600 ms. (b) Relative fluorescence intensity of (a), analyzed using Image J.

### 7) Fluorescence imaging of viscosity changes during pyroptosis

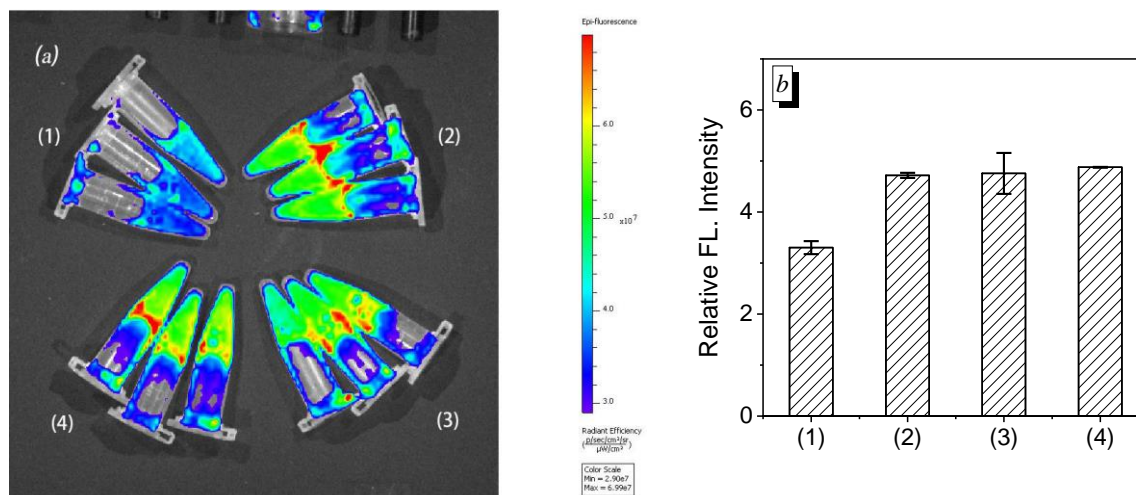

**Fig. S12** (a) Fluorescence imaging of cytoplasmic viscosity in HepG2 cells under PA-induced pyroptosis,  $\lambda_{\text{ex}} = 540$  nm,  $\lambda_{\text{em}} = 620$  nm. (1) Cells treated with P-HV (20  $\mu\text{M}$ , 30 min); (2, 3 and 4) Cells treated with PA (0.03, 0.06 and 0.1 mM, 10 h), respectively, then incubated with P-HV (20  $\mu\text{M}$ , 30 min). (b) Average fluorescence intensities of cell solutions in (a).

### 8) Fluorescence imaging of $\text{H}_2\text{O}_2$ during pyroptosis

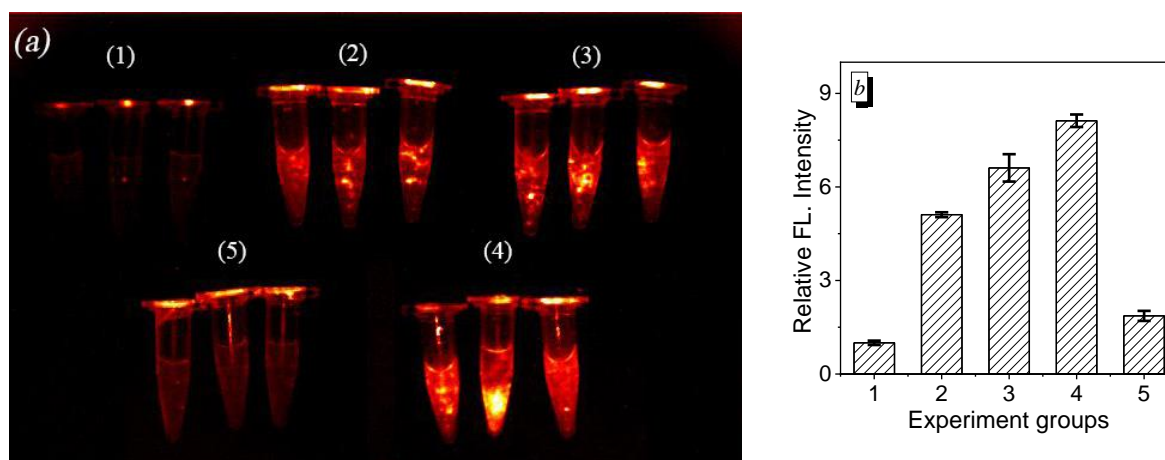

| Entry | NAC<br>(1 mM, 1 h) | PA<br>(0.2 mM) | P-HV<br>(20 $\mu\text{M}$ , 30 min) |
|-------|--------------------|----------------|-------------------------------------|
| (1)   | —                  | —              | +                                   |
| (2)   | —                  | + (6 h)        | +                                   |
| (3)   | —                  | + (12 h)       | +                                   |
| (4)   | —                  | + (18 h)       | +                                   |
| (5)   | +                  | + (12 h)       | +                                   |

**Fig. S13** (a) NIR II fluorescence imaging of endogenous  $\text{H}_2\text{O}_2$  in HepG2 cells under PA-induced pyroptosis,  $\lambda_{\text{ex}} = 808$  nm, long-pass filter: 900 nm, laser intensity: 7 W, exposure time: 600 ms. (b) Relative fluorescence intensity of (a), analyzed using Image J.

## 7. Mice experiments

### 1) Fluorescence imaging of exogenous $H_2O_2$ in mice

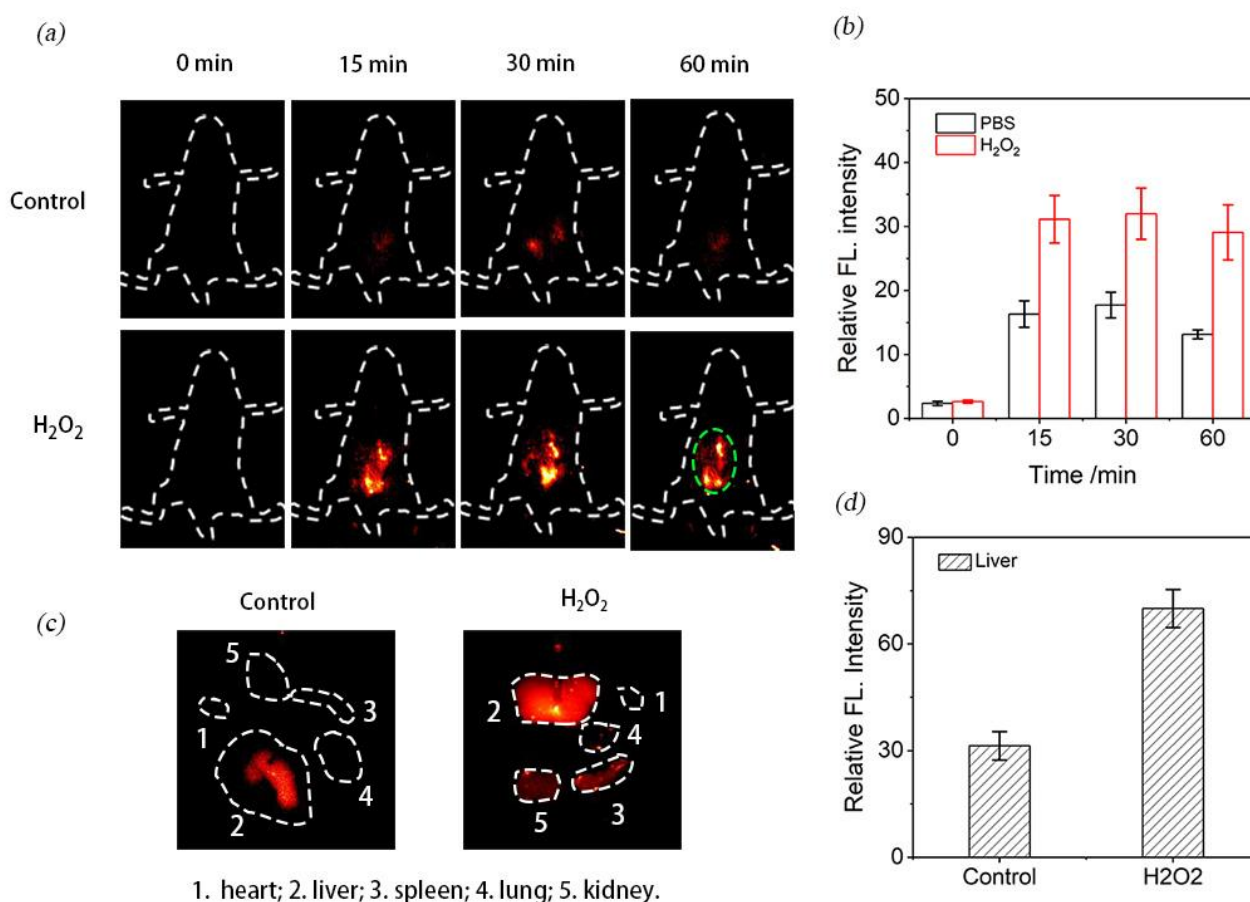

**Fig. S14** (a) Time-dependent NIR II fluorescence imaging of exogenous  $H_2O_2$  in mice. The control and  $H_2O_2$  group mice injected with PBS buffer (pH 7.4, 200  $\mu$ L) and  $H_2O_2$  (3 mM, 200  $\mu$ L) for 30 min, respectively, then injected with P-HV (0.5 mM, 200  $\mu$ L). (b) Average fluorescence intensities at the abdomen region (cyan oval, the same area for each mouse) of the mice in (a). (c) NIR II fluorescence imaging of major organs from (a). The mice and organs were excited at 808 nm, long-pass filter: 900 nm, laser intensity: 10 W, exposure time: 500 ms. (d) Average fluorescence intensities of livers in (c), analyzed using Image J.



## 2) Fluorescence imaging of viscosity changes in mouse organs

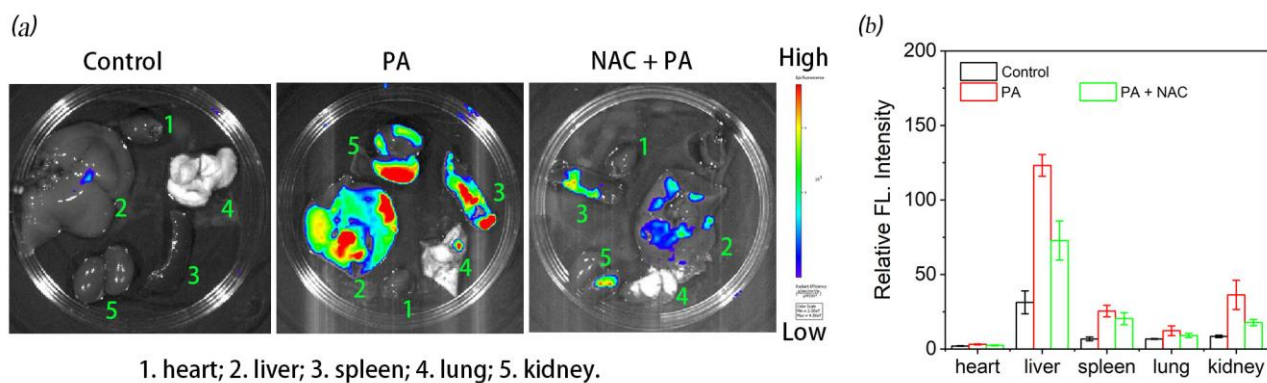

**Fig. S15** (a) Fluorescence imaging of viscosity changes in major mouse organs,  $\lambda_{\text{ex}} = 540 \text{ nm}$ ,  $\lambda_{\text{em}} = 620 \text{ nm}$ . The control and PA group mice injected with PBS buffer (pH 7.4, 200  $\mu\text{L}$ ) and PA (50 mg/kg, 200  $\mu\text{L}$ ) for 12 h, respectively, then injected with P-HV (0.5 mM, 200  $\mu\text{L}$ ) for another 1 h; The another mouse first injected with NAC (200 mg/kg, 200  $\mu\text{L}$ , 1 h) and the following process was the same as the PA group. (b) Average fluorescence intensities of major organs in (a).

8. Copies of NMR spectra of related compound

$^1\text{H}$  NMR (500 MHz,  $\text{CDCl}_3$ ,  $25^\circ\text{C}$ , TMS) of P-HV

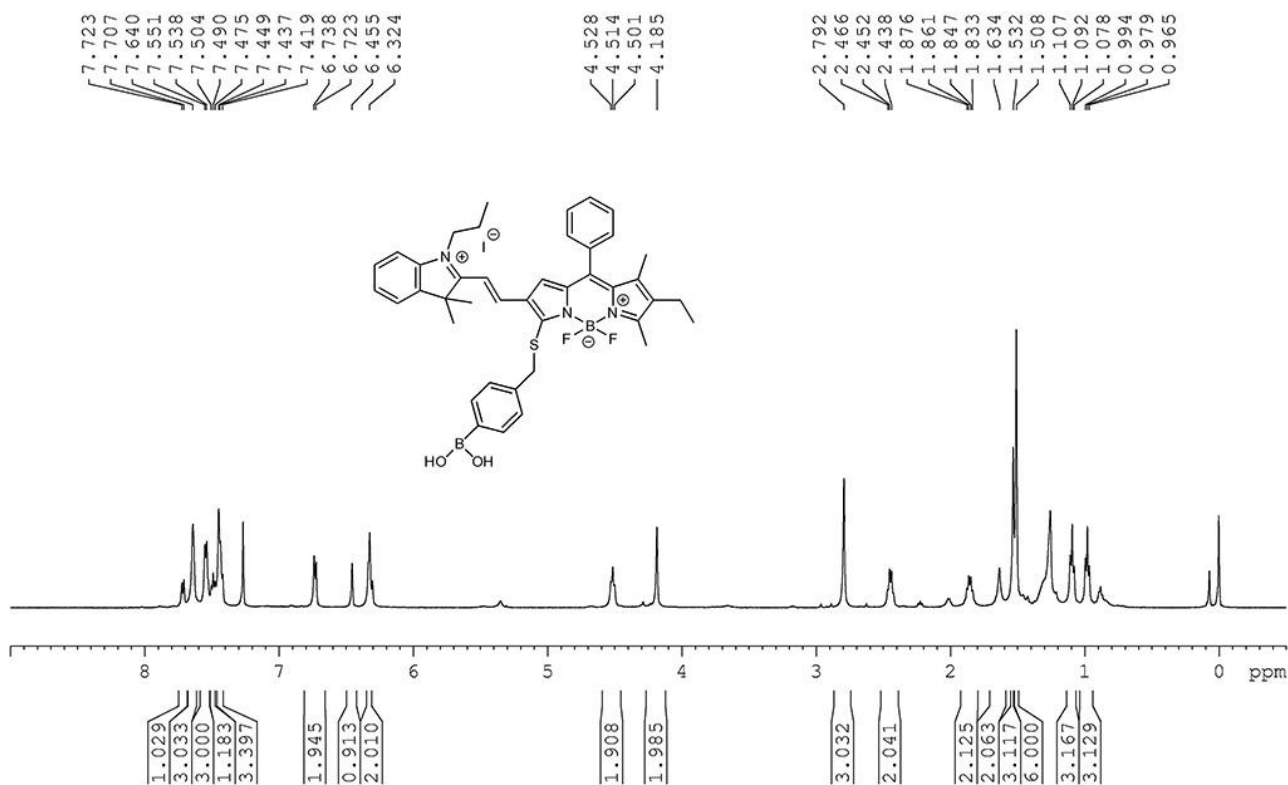

$^{13}\text{C}$  NMR (101 MHz,  $\text{CDCl}_3$ ,  $25^\circ\text{C}$ , TMS) of P-HV

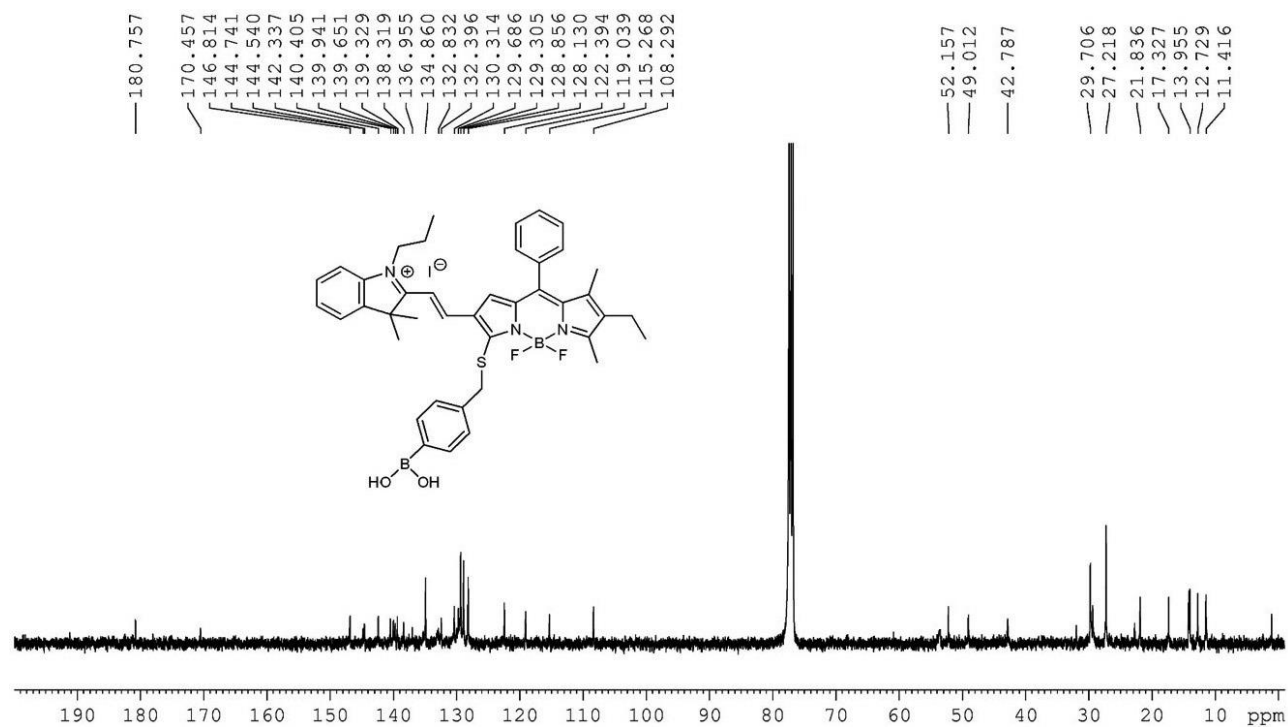

Supplement: d3cc03914e1.pdf [file d3cc03914e1.pdf]
